# Supplementary material for: Activation of RAAS Signaling Contributes to Hypertension in Aged Hyp Mice
Source: MDPI journal article supplement (doi:10.3390/biomedicines10071691), 2022-07-13
Supplement: s1 [file s1]

## Supplementary material

### **Activation of RAAS Signaling Contributes to Hypertension in Aged *Hyp* Mice**

Nejla Latic<sup>1</sup>, Ana Zupcic<sup>1</sup>, Danny Frauenstein<sup>1</sup>, Reinhold G. Erben<sup>1\*</sup>

**\* Corresponding author:**

Reinhold G. Erben, M.D., D.V.M.

Dept. of Biomedical Sciences, University of Veterinary Medicine,

Veterinaerplatz 1, 1210 Vienna, Austria

Phone +43-1-250 77 4550, E-mail Reinhold.Erben@vetmeduni.ac.at

**Supplementary Table S1** – Mouse primer sequences for quantitative real-time PCR analysis

| <b>Gene</b> | <b>Forward (5'-3')</b>      | <b>Reverse (5'-3')</b>         |
|-------------|-----------------------------|--------------------------------|
| <i>Bnp</i>  | GCC AGT CTC CAG AGC AAT TCA | GCC ATT TCC TCC GAC TTT TCT    |
| <i>Anp</i>  | GGC CAT ATT GGA GCA AAT CCT | GCA GGT TCT TGA AAT CCA TCA GA |
